# Supplementary material for: Mental health benefits of a 1-week intensive multimodal group program for adolescents with multiple adverse childhood experiences
Source: PubMed Central journal article supplement (PMC8627589; doi:10.1016/j.chiabu.2021.105349), 2021-10-07
Supplement: NIHMS1750289-supplement-Supplementary_Data.pdf [file NIHMS1750289-supplement-Supplementary_Data.pdf]

## **Supplementary information**

**Mental health benefits of a 1-week intensive multimodal group program for adolescents with multiple adverse childhood experiences.**

**Table S1a. 1-week intensive multimodal program for multiple ACE schedule.**

| Time                | Day 1                                                 | Day 2                                                                     | Day 3          | Day 4                                       | Day 5                                     | Day 6                         | Day 7                                                                                                      | Day 8                |
|---------------------|-------------------------------------------------------|---------------------------------------------------------------------------|----------------|---------------------------------------------|-------------------------------------------|-------------------------------|------------------------------------------------------------------------------------------------------------|----------------------|
| 6:00 - 6:45 am      |                                                       | Awakening with soft music, warm shower and hot beverage                   |                |                                             |                                           |                               |                                                                                                            |                      |
| 6.45-7.30 am        |                                                       | Initiation to yoga + short guided meditation                              |                |                                             |                                           |                               |                                                                                                            |                      |
| 7:30 - 8:30 am      |                                                       | Healthy breakfast                                                         |                |                                             |                                           |                               |                                                                                                            |                      |
| 8:30 - 9:00 am      |                                                       | Mindfulness for adolescents.                                              |                |                                             |                                           |                               |                                                                                                            |                      |
| 9:00 - 11:45 am     | Arrival                                               | Mind-body techniques (includes a break for a healthy snack and beverage)  |                |                                             | EMDR Group Protocol Session 1             | EMDR Group Protocol Session 3 | Integrative arts (acting, dance, music) (if required: EMDR- IGTP in small group and / or EMDR individuald) | Farewell & Departure |
| 11:45 am - 12:30 pm | Welcoming and presentation of activities.             | Swimming pool                                                             |                |                                             |                                           |                               |                                                                                                            |                      |
| 12:30 pm - 1:30 pm  | Healthy lunch                                         |                                                                           |                |                                             |                                           |                               |                                                                                                            |                      |
| 1:30 - 2:30 pm      | Free Time                                             |                                                                           |                |                                             |                                           |                               |                                                                                                            |                      |
| 2.30 - 4.30 pm      | Integrative arts (acting, dance, music, plastic arts) |                                                                           |                |                                             | EMDR Group Protocol Session 2             | EMDR Group Protocol Session 4 | Artistic performance rehearsal                                                                             |                      |
| 4.30-5.30 pm        | Free time/healthy snack and beverage                  |                                                                           |                |                                             |                                           |                               |                                                                                                            |                      |
| 5.30-6.30 pm        | Integrative arts (acting, dance, music)               | Dialogues: healthy food, lifestyle, experiences, sexuality, internet, etc |                |                                             |                                           | Group mandala painting        | Celebration party: mandala exhibit; scenic performance by participants; closing ceremony                   |                      |
| 6:30 -7:00 pm       | Mind-body techniques                                  |                                                                           |                |                                             |                                           |                               |                                                                                                            |                      |
| 7.00 pm             | Healthy dinner                                        | Wellcome party                                                            | Healthy dinner | Healthy dinner and puppet show IEP Colombia | Healthy dinner- inspirational movie night | Healthy dinner                |                                                                                                            |                      |
| between 9-11 pm     | Bed time                                              |                                                                           |                |                                             |                                           |                               |                                                                                                            |                      |

**Table S1b. Control group daily activities (school holiday season).**

| <b>Time</b>      | <b>Activities</b>                                |
|------------------|--------------------------------------------------|
| 6-8 am           | wake up, room cleaning, shower and breakfast     |
| 8-10 am          | physical exercise                                |
| 10-11 am         | holiday homework                                 |
| 11-12 am         | acting, dance, plastic arts                      |
| 12 am - 12.30 pm | table games                                      |
| 12.30-2 pm       | lunch and free time                              |
| 2-4pm            | manual activity, e.g. needlework                 |
| 4-5 pm           | cinema forum, reading club                       |
| 5-6 pm           | physical exercise                                |
| 6-7 pm           | dinner                                           |
| 7-7.30 pm        | spiritual activity, e.g. prayer or bible reading |
| 8 pm             | sleep time                                       |

**Table S2. Odds ratio and 95% confidence interval for pairwise associations between types of ACEs**

|                                 | 1. Emotional abuse | 2. Physical abuse | 3. Sexual abuse | 4. Emotional neglect | 5. Physical neglect | 6. Parent separation | 7. Domestic violence | 8. Substance abuse  | 9. Mental illness | 10. Incarcerated member |
|---------------------------------|--------------------|-------------------|-----------------|----------------------|---------------------|----------------------|----------------------|---------------------|-------------------|-------------------------|
|                                 | OR (95% CI)        | OR (95% CI)       | OR (95% CI)     | OR (95% CI)          | OR (95% CI)         | OR (95% CI)          | OR (95% CI)          | OR (95% CI)         | OR (95% CI)       | OR (95% CI)             |
| 1. Emotional abuse              |                    | 7.2 (2.0; 30.1)** | 0.6 (0.2; 2.1)  | 1.2 (0.3; 4.4)       | 1.3 (0.4; 4.7)      | 0.3 (0.1; 1.1)       | 1.1(0.3; 3.7)        | 1.0 (0.3; 3.4)      | 1.4 (0.4; 4.8)    | 1.0 (0.3; 3.2)          |
| 2. Physical abuse               | 7.2 (2.0; 30.1)**a |                   | 0.6 (0.2; 2.0)  | 1.4 (0.4; 5.0)       | 1.3 (0.4; 4.3)      | 0.2 (0.0; 0.9)       | 1.5 (0.4; 5.1)       | 2.1 (0.6; 7.3)      | 1.4 (0.4; 4.8)    | 1.4 (0.4; 4.8)          |
| 3. Sexual abuse                 | 0.6 (0.2; 2.1)     | 0.6 (0.2; 2.0)    |                 | 1.1 (0.3; 3.9)       | 0.9 (0.2; 3.0)      | 0.5 (0.1; 1.8)       | 2.4 (0.7; 8.4)       | 1.7 (0.5; 5.9)      | 0.6 (0.2; 2.0)    | 1.3 (0.4; 4.3)          |
| 4. Emotional neglect            | 1.2 (0.3; 4.4)     | 1.4 (0.4; 5.0)    | 1.1 (0.3; 3.9)  |                      | 1.6 (0.5; 6.3)      | 0.5 (0.1; 1.9)       | 0.4 (0.1; 1.2)       | 0.5 (0.1; 1.7)      | 2.1 (0.6; 7.9)    | 0.6 (0.2; 2.2)          |
| 5. Physical neglect             | 1.3 (0.4; 4.7)     | 1.3 (0.4; 4.3)    | 0.9 (0.2; 3.0)  | 1.6 (0.5; 6.3)       |                     | 1.2 (0.3; 4.6)       | 2.4 (0.7; 8.4)       | 2.5 (0.7; 9.0)      | 0.9 (0.3; 2.9)    | 0.6 (0.2; 2.0)          |
| 6. Biological parent separation | 0.3 (0.1; 1.1)     | 0.2 (0.0; 0.9)*c  | 0.5 (0.1; 1.8)  | 0.5 (0.1; 1.9)       | 1.2 (0.3; 4.6)      |                      | 0.3 (0.1; 1.3)       | 0.5 (0.1; 1.7)      | 0.6 (0.1; 2.2)    | 0.9 (0.2; 3.4)          |
| 7. Domestic violence            | 1.1(0.3; 3.7)      | 1.5 (0.4; 5.1)    | 2.4 (0.7; 8.4)  | 0.4 (0.1; 1.2)       | 2.4 (0.7; 8.4)      | 0.3 (0.1; 1.3)       |                      | 11.9 (3.1; 56.3)*** | 1.0 (0.3; 3.4)    | 2.2 (0.7; 7.7)          |
| 8. Substance abuse              | 1.0 (0.3; 3.4)     | 2.1 (0.6; 7.3)    | 1.7 (0.5; 5.9)  | 0.5 (0.1; 1.7)       | 2.5 (0.7; 9.0)      | 0.5 (0.1; 1.7)       | 11.9 (3.1; 56.3)***b |                     | 0.7 (0.2; 2.3)    | 3.1 (0.9; 11.2)         |
| 9. Mental illness               | 1.4 (0.4; 4.8)     | 1.4 (0.4; 4.8)    | 0.6 (0.2; 2.0)  | 2.1 (0.6; 7.9)       | 0.9 (0.3; 2.9)      | 0.6 (0.1; 2.2)       | 1.0 (0.3; 3.4)       | 0.7 (0.2; 2.3)      |                   | 1.0 (0.3; 3.3)          |
| 10. Incarcerated member         | 1.0 (0.3; 3.2)     | 1.4 (0.4; 4.8)    | 1.3 (0.4; 4.3)  | 0.6 (0.2; 2.2)       | 0.6 (0.2; 2.0)      | 0.9 (0.2; 3.4)       | 2.2 (0.7; 7.7)       | 3.1 (0.9; 11.2)     | 1.0 (0.3; 3.3)    |                         |

\* p value <0.05; \*\* p value <0.01; \*\*\* p value <0.001

**Table S3.** Tukey's post-hoc comparisons were conducted to analyse changes across time within each group using age, body mass index and number of ACEs and fostering institution as covariates. Baseline (T1), post-intervention (T2) and 2-months follow-up (T3) are indicated.

| Scale         | Control group        |                      |                      | Intervention group     |                        |                      |
|---------------|----------------------|----------------------|----------------------|------------------------|------------------------|----------------------|
|               | Change, (SE)         |                      |                      | Change, (SE)           |                        |                      |
|               | T2-T1                | T3-T1                | T3-T2                | T2-T1                  | T3-T1                  | T3-T2                |
|               | <i>p-value</i>       |                      |                      | <i>p-value</i>         |                        |                      |
| <b>SPRINT</b> | -3.9, (1.5)<br>0.031 | -1.6, (1.7)<br>0.578 | 2.3, (1.7)<br>0.398  | -13.3, (1.5)<br><0.001 | -13.7, (1.5)<br><0.001 | -0.4, (1.5)<br>0.969 |
| <b>CPSS</b>   | -2.9, (2.3)<br>0.420 | -3.4, (2.5)<br>0.435 | -0.3, (2.5)<br>0.996 | -12.0, (2.3)<br><0.001 | -11.6, (2.4)<br><0.001 | 0.4, (2.4)<br>0.871  |
| intrusion     | -2.1, (0.8)<br>0.039 | -1.9, (0.8)<br>0.077 | 0.2, (0.8)<br>0.994  | -5.6, (0.8)<br><0.001  | -5.4, (0.8)<br><0.001  | 0.2, (0.8)<br>0.718  |
| avoidance     | -0.3, (0.7)<br>0.898 | -0.9, (0.7)<br>0.359 | -0.6, (0.7)<br>0.591 | -2.5, (0.6)<br><0.001  | -1.9, (0.7)<br>0.020   | 0.6, (0.7)<br>0.557  |
| dysphoria     | -0.5, (1.0)<br>0.991 | -0.7, (1.1)<br>0.992 | -0.2, (1.1)<br>1.000 | -4.0, (1.0)<br><0.001  | -3.8, (1.0)<br>0.002   | 0.2, (1.0)<br>0.949  |
| arousal       | -0.2, (0.5)<br>0.930 | 0.1, (0.5)<br>0.994  | 0.3, (0.5)<br>0.900  | 0.1, (0.5)<br>0.960    | -0.5, (0.5)<br>0.692   | -0.6, (0.5)<br>0.529 |
| <b>MAAS-A</b> | 6.1, (3.8)<br>0.229  | 2.4, (4.0)<br>0.725  | -3.7, (4.0)<br>0.696 | 26.9, (3.7)<br><0.001  | 18.8, (3.9)<br><0.001  | -8.1, (3.8)<br>0.106 |

**Table S4.** Fixed effect estimators of mixed model for MAAS-A, SPRINT and CPSS scales.

Estimators, standard deviation, 95% confidence interval and p-value of the fixed effects for mixed models are shown. There is a significant effect of group x time interaction for the three scales studied; the positive estimator indicates an increase in the slope in MAAS-A scale and a decrease in the slope in SPRINT and CPSS scales. Group and time effects separately are not significant with the exception of T2 in SPRINT scale.

|                           | Fixed effects |      |                 | <i>p-value</i> |
|---------------------------|---------------|------|-----------------|----------------|
|                           | Estimator     | SD   | [95% CI]        |                |
| <b>MAAS-A</b>             |               |      |                 |                |
| Intercept                 | 46.96         | 3.27 | [40.66, 53.25]  | <0.001         |
| Group (Intervention)      | -3.91         | 4.54 | [-12.64, 4.86]  | 0.390          |
| Time - T2                 | 6.32          | 3.81 | [-1.06, 13.67]  | 0.102          |
| Time - T3                 | 3.01          | 4.04 | [-4.75, 10.88]  | 0.446          |
| Group (Intervention) : T2 | 20.13         | 5.32 | [9.87, 30.45]   | <0.001         |
| Group (Intervention) : T3 | 15.57         | 5.61 | [4.76, 26.45]   | <0.01          |
| <b>SPRINT</b>             |               |      |                 |                |
| Intercept                 | 18.01         | 1.67 | [14.78, 21.23]  | <0.001         |
| Group (Intervention)      | 0.09          | 2.34 | [-4.44, 4.62]   | 0.971          |
| Time - T2                 | -3.91         | 1.51 | [-6.83, -0.98]  | 0.012          |
| Time - T3                 | -1.70         | 1.69 | [-4.98, 1.58]   | 0.319          |
| Group (Intervention) : T2 | -9.36         | 2.14 | [-13.50, -5.23] | <0.001         |
| Group (Intervention) : T3 | -11.94        | 2.27 | [-16.33, -7.55] | <0.001         |
| <b>CPSS total</b>         |               |      |                 |                |
| Intercept                 | 45.69         | 2.50 | [40.84, 50.55]  | <0.001         |
| Group (Intervention)      | -5.19         | 3.52 | [-12.01, 1.62]  | 0.144          |
| Time - T2                 | -2.86         | 2.27 | [-7.25, 1.52]   | 0.210          |
| Time - T3                 | -3.08         | 2.48 | [-7.88, 1.72]   | 0.219          |
| Group (Intervention) : T2 | -9.18         | 3.20 | [-15.38, -2.98] | 0.005          |
| Group (Intervention) : T3 | -7.77         | 3.44 | [-14.44, -1.13] | 0.026          |

**Table S5.** Cronbach alpha was computed to assess the internal consistency of scales.

a. Cronbach’s alpha coefficients for MAAS-A, SPRINT and CPSS total scores.

b. Cronbach’s alpha coefficients for CPSS subscale scores.

Cronbach’s alpha coefficients that are less than 0.5 are usually unacceptable while very high values (i.e., > 0.95), may indicate redundancy in the scale items.

|                       | Internal Consistency |              |      | Internal Consistency |          |
|-----------------------|----------------------|--------------|------|----------------------|----------|
|                       | Cronbach’s $\alpha$  | [95% CI]     |      | Cronbach’s $\alpha$  | [95% CI] |
| <b>a</b>              |                      |              |      |                      |          |
| <b>MAAS-A</b>         |                      |              |      |                      |          |
| Time 1                | 0.56                 | [0.38, 0.82] |      |                      |          |
| Time 2                | 0.91                 | [0.86, 0.94] |      |                      |          |
| Time 3                | 0.85                 | [0.71, 0.91] |      |                      |          |
| <b>SPRINT</b>         |                      |              |      |                      |          |
| Time 1                | 0.84                 | [0.70, 0.90] |      |                      |          |
| Time 2                | 0.93                 | [0.88, 0.96] |      |                      |          |
| Time 3                | 0.90                 | [0.83, 0.94] |      |                      |          |
| <b>CPSS total</b>     |                      |              |      |                      |          |
| Time 1                | 0.87                 | [0.77, 0.91] |      |                      |          |
| Time 2                | 0.94                 | [0.90, 0.96] |      |                      |          |
| Time 3                | 0.93                 | [0.89, 0.95] |      |                      |          |
| <b>b</b>              |                      |              |      |                      |          |
| <b>CPSS intrusion</b> |                      |              |      |                      |          |
| Time 1                |                      |              | 0.78 | [0.64, 0.87]         |          |
| Time 2                |                      |              | 0.87 | [0.77, 0.92]         |          |
| Time 3                |                      |              | 0.90 | [0.84, 0.94]         |          |
| <b>CPSS avoidance</b> |                      |              |      |                      |          |
| Time 1                |                      |              | 0.49 | [0.14, 0.69]         |          |
| Time 2                |                      |              | 0.74 | [0.58, 0.84]         |          |
| Time 3                |                      |              | 0.46 | [-0.07, 0.70]        |          |
| <b>CPSS dysphoria</b> |                      |              |      |                      |          |
| Time 1                |                      |              | 0.83 | [0.71, 0.90]         |          |
| Time 2                |                      |              | 0.86 | [0.79, 0.91]         |          |
| Time 3                |                      |              | 0.87 | [0.76, 0.92]         |          |
| <b>CPSS arousal</b>   |                      |              |      |                      |          |
| Time 1                |                      |              | 0.27 | [-0.41, 0.63]        |          |
| Time 2                |                      |              | 0.78 | [0.60, 0.89]         |          |
| Time 3                |                      |              | 0.53 | [0.05, 0.77]         |          |

**Figure S1.** Random effect of random intercepts are shown for MAAS-A (a), SPRINT (b) and CPSS (c). 95% confidence intervals are depicted. Random effects show similar distribution and effect range; black points indicate confidence intervals that do not overlap with zero.

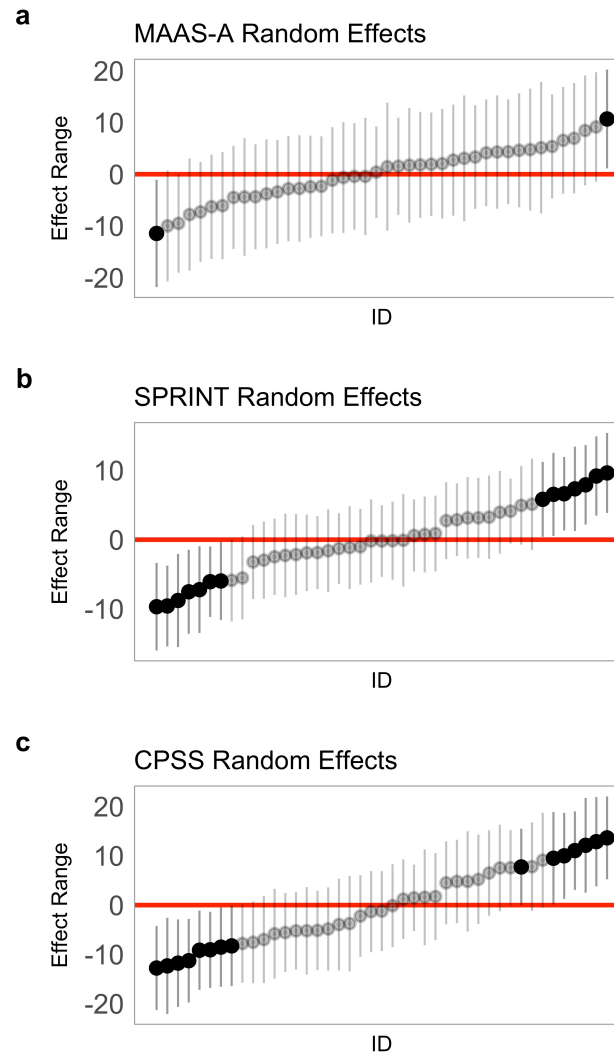



**Table S6. Variance-covariance matrix for MAAS-A, SPRINT and CPSS scales.**

Variance-covariance matrix is shown for all parameters (fixed, random effect, and residual) of the mixed models are depicted. Variances are indicated in the diagonal elements and covariances are located in the off-diagonal elements. The assumption of an unstructured variance-covariance matrix is applied to the 3 mixed models tested.

| <b>MAAS-A</b>  | Intercept | Group  | Time T2 | Time T3 | Group x TimeT2 | Group x TimeT3 |
|----------------|-----------|--------|---------|---------|----------------|----------------|
| Intercept      | 10.66     | -10.66 | -7.72   | -7.62   | 7.72           | 7.62           |
| Group          | -10.66    | 20.58  | 7.72    | 7.62    | -15.02         | -14.94         |
| Time T2        | -7.72     | 7.72   | 14.52   | 7.63    | -14.52         | -7.63          |
| Time T3        | -7.62     | 7.62   | 7.63    | 16.34   | -7.63          | -16.34         |
| Group x TimeT2 | 7.72      | -15.02 | -14.52  | -7.63   | 28.32          | 14.95          |
| Group x TimeT3 | 7.62      | -14.94 | -7.63   | -16.34  | 14.95          | 31.45          |

  

| <b>SPRINT</b>  | Intercept | Group | Time T2 | Time T3 | Group x TimeT2 | Group x TimeT3 |
|----------------|-----------|-------|---------|---------|----------------|----------------|
| Intercept      | 2.77      | -2.77 | -1.14   | -1.13   | 1.14           | 1.13           |
| Group          | -2.77     | 5.46  | 1.14    | 1.13    | -2.28          | -2.28          |
| Time T2        | -1.14     | 1.14  | 2.28    | 1.14    | -2.28          | -1.14          |
| Time T3        | -1.13     | 1.13  | 1.14    | 2.87    | -1.14          | -2.87          |
| Group x TimeT2 | 1.14      | -2.28 | -2.28   | -1.14   | 4.57           | 2.28           |
| Group x TimeT3 | 1.13      | -2.28 | -1.14   | -2.87   | 2.28           | 5.15           |

  

| <b>CPSS</b>    | Intercept | Group | Time T2 | Time T3 | Group x TimeT2 | Group x TimeT3 |
|----------------|-----------|-------|---------|---------|----------------|----------------|
| Intercept      | 6.27      | -6.27 | -2.57   | -2.55   | 2.57           | 2.55           |
| Group          | -6.27     | 12.36 | 2.57    | 2.55    | -5.13          | -5.12          |
| Time T2        | -2.57     | 2.57  | 5.13    | 2.57    | -5.13          | -2.57          |
| Time T3        | -2.55     | 2.55  | 2.57    | 6.16    | -2.57          | -6.16          |
| Group x TimeT2 | 2.57      | -5.13 | -5.13   | -2.57   | 10.26          | 5.13           |
| Group x TimeT3 | 2.55      | -5.12 | -2.57   | -6.16   | 5.13           | 11.85          |
